# Supplementary material
Source: PubMed Central journal article supplement (PMC5715788)
Supplement: pnas.201716015SI.pdf [file pnas.201716015SI.pdf]

# Supporting Information

Jang et al. 10.1073/pnas.1716015114

**Table S1. Cytokines regulated by hRetn during endotoxic shock**

| Cytokine       | Naive            |                  | LPS-challenged       |                     |                     |
|----------------|------------------|------------------|----------------------|---------------------|---------------------|
|                | Tg <sup>-</sup>  | Tg <sup>+</sup>  | C57BL/6              | Tg <sup>-</sup>     | Tg <sup>+</sup>     |
| IFN $\gamma$   | ND               | ND               | 1,236 $\pm$ 179.4    | 459.6 $\pm$ 98.59   | 152.4 $\pm$ 46.84   |
| IL-12p70       | ND               | ND               | 148.0 $\pm$ 4.2      | 89.4 $\pm$ 4.8      | 49.9 $\pm$ 13.2     |
| IL-13          | ND               | ND               | 38.3 $\pm$ 3.4       | 30.7 $\pm$ 3.3      | 35.36 $\pm$ 3.4     |
| IL-1 $\beta$   | 4.8 $\pm$ 1.5    | 5.5 $\pm$ 2.7    | 176.0 $\pm$ 24.5     | 143.5 $\pm$ 34.8    | 112.8 $\pm$ 48.0    |
| IL-2           | ND               | ND               | 25.5 $\pm$ 8.0       | 76.03 $\pm$ 33.7    | 34.3 $\pm$ 17.3     |
| IL-4           | 2.1 $\pm$ 1.7    | 2.2 $\pm$ 1.1    | 24.3 $\pm$ 1.1       | 18.0 $\pm$ 2.2      | 14.4 $\pm$ 4.0      |
| IL-5           | ND               | ND               | 474.1 $\pm$ 86.3     | 201.5 $\pm$ 20.6    | 194.7 $\pm$ 27.2    |
| IL-6           | 11.2 $\pm$ 6.6   | 17.0 $\pm$ 9.8   | 78,647 $\pm$ 5,830   | 42,149 $\pm$ 2,913  | 23,779 $\pm$ 8,731  |
| TNF $\alpha$   | 0.3 $\pm$ 0.2    | 7.5 $\pm$ 2.9    | 911.5 $\pm$ 97.3     | 749.7 $\pm$ 79.7    | 309.3 $\pm$ 123.6   |
| GM-CSF         | 3.5 $\pm$ 3.0    | 6.6 $\pm$ 6.6    | 157.3 $\pm$ 6.0      | 132.8 $\pm$ 5.3     | 74.03 $\pm$ 15.2    |
| IL-18          | ND               | ND               | 3,658 $\pm$ 136.2    | 15,587 $\pm$ 2,520  | 11,194 $\pm$ 3,065  |
| IL-10          | ND               | ND               | 248.1 $\pm$ 58.8     | 348.9 $\pm$ 23.33   | 722.8 $\pm$ 47.2    |
| IL-17a         | 4.0 $\pm$ 2.6    | 5.9 $\pm$ 3.0    | 108.0 $\pm$ 12.6     | 54.08 $\pm$ 11.8    | 46.23 $\pm$ 13.8    |
| IL-22          | 5.9 $\pm$ 5.9    | ND               | 48,239 $\pm$ 3,259   | 24,175 $\pm$ 6,096  | 18,114 $\pm$ 6,877  |
| IL-23          | ND               | 9.4 $\pm$ 9.4    | 165.5 $\pm$ 19.6     | 140.6 $\pm$ 26.8    | 104.5 $\pm$ 16.0    |
| IL-27          | 7.3 $\pm$ 1.0    | 10.05 $\pm$ 1.8  | 404.6 $\pm$ 17.0     | 137.2 $\pm$ 33.7    | 63.4 $\pm$ 14.5     |
| IL-9           | ND               | ND               | 180.5 $\pm$ 10.5     | 121.7 $\pm$ 26.0    | 91.11 $\pm$ 15.4    |
| GRO- $\alpha$  | 34.0 $\pm$ 8.1   | 24.2 $\pm$ 1.6   | 95,373 $\pm$ 6,020   | 48,714 $\pm$ 10,385 | 48,984 $\pm$ 11,858 |
| IP-10          | 6.1 $\pm$ 0.3    | 7.2 $\pm$ 1.6    | 2,209 $\pm$ 212.7    | 1,171 $\pm$ 177.6   | 1,358 $\pm$ 259.1   |
| MCP-1          | ND               | ND               | 122,252 $\pm$ 11,059 | 82,231 $\pm$ 13,726 | 71,782 $\pm$ 20,250 |
| MCP-3          | 38.7 $\pm$ 11.2  | 35.62 $\pm$ 7.8  | 4,226 $\pm$ 99.8     | 3,530 $\pm$ 475.4   | 3,571 $\pm$ 469.3   |
| MIP-1 $\alpha$ | ND               | ND               | 1,123 $\pm$ 97.7     | 248 $\pm$ 76.1      | 153.9 $\pm$ 30.1    |
| MIP-1 $\beta$  | ND               | ND               | 4,253 $\pm$ 310.6    | 1,310 $\pm$ 345.3   | 862.3 $\pm$ 221.3   |
| MIP-2          | 27.92 $\pm$ 5.8  | 31.4 $\pm$ 6.3   | 6,932 $\pm$ 585.3    | 3,262 $\pm$ 469.1   | 2,352 $\pm$ 793.7   |
| RANTES         | ND               | ND               | 4,376 $\pm$ 133.9    | 2,327 $\pm$ 404.9   | 1,622 $\pm$ 382.4   |
| Eotaxin        | 66.6 $\pm$ 13.6  | 76.23 $\pm$ 10.5 | 3,879 $\pm$ 98.1     | 2,708 $\pm$ 341.2   | 2,113 $\pm$ 398.9   |
| IL-28          | 148.3 $\pm$ 31.8 | 155.5 $\pm$ 32.1 | 539.6 $\pm$ 215.5    | 506.2 $\pm$ 215.6   | 436.3 $\pm$ 159.8   |
| IL-3           | 3.4 $\pm$ 0.6    | 3.9 $\pm$ 0.5    | 3.8 $\pm$ 0.2        | 3.2 $\pm$ 0.5       | 3.6 $\pm$ 0.4       |
| G-CSF          | ND               | ND               | 3,520 $\pm$ 442.2    | 2,717 $\pm$ 386.4   | 2,672 $\pm$ 301.7   |
| M-CSF          | ND               | ND               | 7.0 $\pm$ 0.8        | 23.8 $\pm$ 3.5      | 38.7 $\pm$ 11.4     |
| LIF            | ND               | ND               | 604.7 $\pm$ 52.81    | 311.8 $\pm$ 69.8    | 191.9 $\pm$ 58.7    |
| IL-1 $\alpha$  | 47.2 $\pm$ 3.4   | 49.0 $\pm$ 1.7   | 124.0 $\pm$ 4.6      | 147.3 $\pm$ 16.2    | 114.0 $\pm$ 14.7    |
| ENA-78         | 164.4 $\pm$ 86.5 | 195.1 $\pm$ 77.5 | 3,713 $\pm$ 360.2    | 3,623 $\pm$ 292.8   | 3,054 $\pm$ 667.8   |

WT, hRETNTg<sup>-</sup> and hRETNTg<sup>+</sup> mice were left naive or challenged with two doses of LPS and serum was collected 6 h after the second dose. Cytokines (pg/mL) in the serum were measured by Luminex. ND, not detected.

**Table S2. hRETNTg insertion sites in the transgenic mice**

| Mouse                | Chromosome | Position  | Location                  |
|----------------------|------------|-----------|---------------------------|
| hRETNTg <sup>+</sup> | X          | 138412518 | Intron of <i>Il1rapl2</i> |
| Tg2                  | 1          | 93446321  | Intron of <i>Hdlbp</i>    |
|                      | 1          | 165624851 | Intron of <i>Mpzl1</i>    |
|                      | 3          | 33231313  | Noncoding region          |
|                      | 5          | 57598562  | Noncoding region          |
|                      | 6          | 28049256  | Intron of <i>Grm8</i>     |
|                      | 7          | 51435070  | Noncoding region          |
|                      | 7          | 63552133  | Intron of <i>Otud7a</i>   |
|                      | 10         | 109378627 | Noncoding region          |
